# Supplementary material
Source: MDPI journal article supplement (https://www.mdpi.com/2306-5338/9/10/180)
Supplement: s1 [file s1]

---

**Supplementary Tables**

TableS1. Questionnaire for seeking information from Forest Department

**Area Under Forest Cover:****Total green spaces area (in ha) in city**

1. Parks
2. Holy/sacred groves
3. Avenue plantations
4. Plant nurseries
5. Forest reserves, if any
6. Garden/park lawns in public places
7. Government offices areas

**Maintenance practices**

1. Types of plants/trees planted
2. Plant health care details
3. Frequency of pruning
4. Frequency of replacements
5. Frequency of manuring
6. Frequency of watering
7. Source of water
8. Types of distribution methods
9. Number of people employed

Table S2. Questionnaire for Urban Planning Department

1. What are your ideas of “smart” city?
2. Who is the deciding authority to implement smart city idea ?
3. When was the idea of smart city implemented by the city corporation?
4. What are the roles of your Department in implementation of smart city concept?
5. What are challenges faced in smart city planning and design?
6. How can the challenges be overcome?
7. What are the policy steps or implantation plans in place for resolving public
8. According to you, what are the environmental problems faced in the cities?
9. How are the issues addressed and dealt with?
10. What are the challenges faced in addressing and dealing with the issues?
11. If so, what are your plans for including green spaces (including parks, city forests, and forest reserves) in city design?
12. What are your ideas for designing cities so that they have adequate green spaces?
13. Is adequate allowance made for green spacing in the smart city?
14. What are the challenges faced in designing cities with adequate green spaces?
15. What are your ideas/strategies to address and solve the problems?
16. What is the total green spaces area (in hectares) in the city, including parks, city forests, and forest reserves? Will be sought only if the Corporation offices do not have the data...
17. Are there plans to increase green spaces in the city?
18. If so, what are your ideas/strategies to expand the green areas?
19. What are the challenges in creating new green areas?
20. What are challenges faced in maintaining presently existing green areas?
21. What are the challenges faced in expanding the green areas?
22. What future trends do you foresee in urban planning, design, and development?
23. What possible environmental issues and solutions do you foresee?

Table S3. Questionnaire for Municipal/City Corporation Office

1. Smart city concept initiation year
2. Vision statement
3. Ideas of “smart” city
4. Associated Departments
5. List of new urbanization projects
6. Probable dates of planned for implementation
7. Services the department providing to the city residents
8. Major challenges faced in providing the services
9. New services planned and provided after the smart city concept
10. Environmental concerns and issues
11. Steps taken by the department to address and dealt with the concerns
12. Challenges faced in addressing and dealing with the issues
13. New/additional environmental issues anticipated, and solutions thought of
14. Total green spaces area (in hectares) in the city,
  1. Parks
  2. Holy/sacred groves
  3. Avenue plantations
  4. Plant nurseries
  5. Forest reserves, if any
15. Challenges faced in expanding the green areas
16. Challenges faced in maintaining existing green areas
17. Information/details of plans to increase green spaces
18. Plans or ideas/strategies to expand the green areas
19. Anticipated challenges in creating new green areas
20. List of stakeholders
21. Amounts of funds allocated (if available/sharable)

Table S4. Questionnaire for Sewage Handling Department

**Sewage Handling Department**

1. Total number of STPs
2. Volume of sewage received at each STP
3. Frequency of effluent reception
4. Duration of treatment
5. Type of treatment
6. Frequency of chlorination
7. List of Reuse practices
8. Distribution methods at user end
9. Role of public works department
10. Frequency of treated water disposal
11. Modes of disposal
12. Types of distribution methods
13. Number of people employed to handle treatment and disposal

Post treatment water quality monitoring (nutrients/nitrate, phosphate, pH, dissolved oxygen, heavy metals, oil/lipid concentration, total organic carbon, turbidity)
